# CRMnet: a deep learning model for predicting gene expression from large regulatory sequence datasets

Ke Ding<sup>1</sup>, Gunjan Dixit<sup>1</sup>, Brian J. Parker<sup>2†</sup>, and Jiayu Wen,<sup>1†</sup>

<sup>1</sup>*Division of Genome Science and Cancer, John Curtin School of Medical Research, Australian National University, Canberra, ACT, Australia*

<sup>2</sup>*School of Computing and Biological Data Science Institute, Australian National University, Canberra, ACT, Australia*

Correspondence\*:

†These authors contributed equally to this work and share last authorship.

Brian.Parker@anu.edu.au; Jiayu.Wen@anu.edu.au

## 2 ABSTRACT

3 Recent large datasets measuring the gene expression of millions of possible gene promoter  
4 sequences provide a resource to design and train optimised deep neural network architectures  
5 to predict expression from sequences. High predictive performance due to the modelling of  
6 dependencies within and between regulatory sequences is an enabler for biological discoveries  
7 in gene regulation through model interpretation techniques.

8 To understand the regulatory code that delineates gene expression, we have designed a novel  
9 deep-learning model (CRMnet) to predict gene expression in *Saccharomyces cerevisiae*. Our  
10 model outperforms the current benchmark models and achieves a Pearson correlation coefficient  
11 of 0.971. Interpretation of informative genomic regions determined from model saliency maps, and  
12 overlapping the saliency maps with known yeast motifs, support that our model can successfully  
13 locate the binding sites of transcription factors that actively modulate gene expression. We  
14 compare our model's training times on a large compute cluster with GPUs and Google TPUs to  
15 indicate practical training times on similar datasets.

16 **Keywords:** deep learning, big data, gene expression, yeast, genomics, HPC

## 1 INTRODUCTION

17 Cis-regulatory sequences also referred to as cis-regulatory modules (CRMs), are composed of promoters,  
18 enhancers, silencers, and insulators (Davidson and Erwin, 2006). The DNA-binding regulatory proteins,  
19 transcription factors (TF), identify and bind to particular cis-regulatory sequences to control gene  
20 expression (Ni and Su, 2021). Alterations to the cis-regulatory sequences will influence the interaction with  
21 transcription factors, thereby influencing cell phenotype and cell-state transitions (de Boer et al., 2020).  
22 Increasing evidence demonstrates the significance of cis-regulatory element modification in relation to  
23 numerous diseases, such as cancer and diabetes (Mathelier et al., 2015). Thus, understanding how cis-  
24 regulatory elements regulate gene expression has become critical for us to understand transcriptional gene  
25 regulation. However, it has been extremely difficult to directly predict the expression of DNA sequences  
26 due to a lack of high quality data. Recently, more than 100 million random promoter sequences and  
27 their corresponding expression levels have been identified in a high-throughput manner by measuring the  
28 expression output of the sequences regulating yeast gene constructs using Gigantic Parallel Reporter Assay

29 (GPRA) (de Boer et al., 2020). This dataset provides the large training sets necessary for developing models  
30 to help decode the cis-regulatory logic. Consequently, sequence-to-expression models have been proposed  
31 to predict how changes in cis-regulatory sequences will affect gene expression (Vaishnav et al., 2022).

32 This explosion of genomics data size presents a challenge to conventional analysis methods, and the  
33 subtle long-range interactions in genomic data challenge the explicit feature engineering stage required in  
34 other predictive modelling approaches. Deep learning, utilising deep neural network (DNN) models, which  
35 benefits greatly from large datasets, has therefore increasingly found application in genomics. Composed  
36 of multiple (“deep”) processing layers such as convolutional, recurrent, and dense layers, deep learning  
37 models can learn complex patterns and features in large datasets at various abstraction levels by combining  
38 such processing layers into appropriate DNN architectures.

39 Concurrently with the research and development of increasing deep and complex DNN architectures,  
40 the development of parallel acceleration hardware such as graphical processing units (GPUs) and tensor  
41 processing units (TPUs), and high performance clusters/cloud computing, enables the training of these  
42 more complex models by reducing the overall training time (Wang et al., 2020). As neural networks are  
43 becoming more sophisticated and the volume of scientific data keeps growing, the model training time on  
44 these different high performance computing (HPC) architectures is an important issue.

45 In this study, we propose a novel DNN model (CRMnet), a Transformer encoded U-Net, for predicting  
46 the expression levels of yeast promoter DNA sequences, which achieves a Pearson correlation coefficient  
47 of 0.971 in the test dataset, improving upon the benchmark models proposed in (Vaishnav et al., 2022). By  
48 accurately predicting the expression from promoter sequences, such models can be used predictively to  
49 design new regulatory sequences in synthetic biology, study the predicted effects of mutations (Vaishnav  
50 et al., 2022), and, by interpreting the model, help in understanding the determinants of gene regulation.  
51 Here we interpret the model by visualizing saliency maps, showing we are able to identify key regions in  
52 the promoter sequences which most affect the corresponding expression. We demonstrate that our model  
53 can learn biologically meaningful information by quantifying the saliency information over known yeast  
54 sequence motifs. We compare the performance of our model on large datasets on parallel hardware of  
55 graphical processing units (GPUs) and tensor processing units (TPUs) on a HPC cluster.

## 2 CRMNET: SEQUENCE-TO-EXPRESSION DEEP LEARNING MODEL

56 The study of (Vaishnav et al., 2022) experimentally determined the gene expression driven by millions  
57 of random promoter sequences. This was performed by embedding random 80-bp DNA sequences in a  
58 promoter construct with the resultant expression assayed in yeast (*S. cerevisiae*) using high-throughput  
59 sequencing.

60 In this study, we propose an improved novel DNN model to predict the measured expression level of  
61 yeast promoter DNA sequences with higher performance than the convolutional neural network (CNN) and  
62 transformer deep neural network models proposed in (Vaishnav et al., 2022). In this DNN architecture, we  
63 propose a transformer-encoded U-Net (CRMnet). Analogous to the original U-Net model (Ronneberger  
64 et al., 2015), our deep learning model has an initial encoding stage that extracts feature maps at progressively  
65 lower dimensions, optimised for the detection of features such as transcription factor binding sites (average  
66 length of approximately 11bp), and a decoder stage that upscales these feature maps back to the original  
67 sequence dimension, whilst concatenating with the higher resolution feature maps of the encoder at each  
68 level to retain prior information despite the sparse upscaling. This approach decodes a feature map at  
69 base-level precision. Recent work on transformer architectures has shown that their attention mechanisms

70 can extract more global dependency information compared with convolutional layers (Dosovitskiy et al.,  
71 2020); therefore, we included a transformer encoder stage after the convolutional layer to extract this  
72 information.

73 Our model thus consists of four components (Figure 1): 1D convolutional neural network-based encoders  
74 to extract neighboring features in the input DNA sequences, a transformer encoder to extract longer  
75 range dependencies in the input sequence, 1D convolutional neural network-based decoders, with skip  
76 connections, to project the extracted features to the original sequence input dimension, and a multi-layer  
77 perceptron to predict the expression levels from the extracted features.

## 78 **2.1 1D CNN-based Encoder**

79 Our CNN-based encoder is built to extract features from genomic data inputs. The input is one-  
80 dimensional length 112bp DNA sequences (80bp promoter sequence plus padding, see Methods) which  
81 is one-hot encoded (A,C,G,T + N for padding). 1D convolutional layers then learn filter parameters to  
82 extract predictive features from combinations of adjacent bases, with a filter size set to 11 in order to cover  
83 the average length of transcription factor motifs (Stewart et al., 2012). Additionally, we add a squeeze  
84 excitation layer after each 1D convolutional layer because the squeeze and excitation operation has been  
85 demonstrated to improve the overall performance of CNN-based models by assigning importance scores to  
86 the different feature maps (Hu et al., 2018). Moreover, the original U-Net encoder block (Ronneberger et al.,  
87 2015) is modified by performing the down-sampling with a stride two convolution operation instead of max  
88 pooling, as the additional model parameterisation has been shown to improve performance (Springenberg  
89 et al., 2014).

## 90 **2.2 Transformer Encoder**

91 The transformer encoder accepts the CNN's down-scaled feature maps as input. Each individual  
92 transformer encoder block follows the vanilla transformer architecture which is made up of a position-wise  
93 feed-forward network and a multi-head self-attention feed-forward network (FFN) module (Vaswani et al.,  
94 2017). Within each module, residual/skip connections and layer normalization are utilized in order to train  
95 a deeper neural network.

96 Unlike convolutional neural network stages which implicitly extract dependency information in local  
97 neighbourhoods through the use of fixed-size kernels, transformer encoders use self-attention to extract  
98 global dependency information across the inputs, while explicitly encoding the positional information  
99 embedded into the input. Similar to other transformer-encoded models, we embed the positional information  
100 of the down-scaled input vectors (length 14) to our transformer encoder (Chen et al., 2021). We represent  
101 the positional information using sinusoidal position encodings and add it to the input token before feeding  
102 it to the transformer encoder.

## 103 **2.3 1D CNN-based Decoder**

104 The CNN-based decoder blocks are very similar to the original U-Net decoders, which use up-sampling  
105 to learn the representation (Ronneberger et al., 2015). Using a 1D transpose convolution operation to up-  
106 sample the resolution and attaching a squeeze excitation layer after each convolutional layer to up-weight  
107 the critical feature maps are the main differences in our implementation. The outputs are then concatenated  
108 with the skip connections from corresponding encoder levels to compensate for the potential loss of spatial  
109 information during downsampling.

## 110 **2.4 SE Block**

111 It has been demonstrated that using Squeeze-and-Excitation (SE) blocks can significantly improve the  
112 generalization power of CNN-based models and achieve significant performance enhancements in several  
113 state-of-the-art CNN models with negligible increase in computational cost (Hu et al., 2018). The SE Block  
114 will initially compress the input feature map generated by learned convolutional filters using global max  
115 pooling. The channel-specific statistics will then be forwarded to the excitation operation, which will utilize  
116 two non-linear, fully connected layers to highlight the key channels. In other words, the SE Block can be  
117 regarded as a channel-specific self-attention function that compensates for the inability of the convolution  
118 operator to model the relationship among channels. As a result, we decided to adopt the SE operation after  
119 each convolutional layer and added a SE block in order to empower our model to focus on channel-specific  
120 feature responses of the convolution layers.

## 121 **2.5 MLP**

122 Our model will learn the expression levels from the extracted features utilizing a multi-layer perceptron  
123 (MLP). The fully connected dense layer will learn the non-linear combination of the extracted features  
124 from preceding layers. In the hidden layer of MLP, we use ReLU as the activation function (where alpha  
125 equals 0.1). Then, a linear activation is used to make the prediction of the expression levels in the final  
126 output neurons. To avoid overfitting, each dense layer is followed by a dropout layer. The first two dropout  
127 layers' dropout values are equal to 0.2 and the rest have dropout values equal to 0.1.

## 128 **2.6 Pre-training and Fine-tuning of models**

129 We utilized a transfer learning approach to improve the performance of CRMnet. Specifically, to utilize  
130 the largest possible training set we pre-trained a more general model on a large dataset of randomly sampled  
131 data combining datasets from yeast grown in two different media types (“complex” and “defined” from  
132 (Vaishnav et al., 2022)). We then conducted a fine-tuning training stage in which the pre-trained model is  
133 retrained on the complex medium samples only, as used in the test sets of our study. The pre-trained model's  
134 parameters were all unfrozen and trainable. The pre-trained model weights serve as good initializations for  
135 the fine-tuning of particular datasets to improve the model's performance on a target task (You et al., 2021).  
136 As demonstrated in Figure 4, this method of transfer learning can improve model performance.

## 137 **3 RESULTS AND DISCUSSION**

137 We first evaluate the predictive performance of our model and compare the performance to that of existing  
138 deep learning models. We then use ablation studies to understand the roles of the subparts of our model.  
139 To demonstrate the biological significance of our model, we further apply saliency maps for model  
140 interpretation and compare with enriched transcription factor binding site motifs discovered by probabilistic  
141 motif discovery. Finally, we compare the training time between TPUs and GPUs.

### 142 **3.1 Performance evaluation**

143 We here first present the predictive performance of our fine-tuned deep learning model on independent  
144 experimental test sets of both random and native (i.e. wild-type sequences found in yeast) promoter  
145 sequences in both complex and defined mediums (see Methods). To evaluate the performance of the deep  
146 learning models on the test datasets, we measured the Pearson Correlation Coefficient ( $r$ ) and Coefficient  
147 of Determination ( $R^2$ ). The results show that our fine-tuned CRMnet model achieved excellent prediction

148 performance on both native and random sequences ( $r = 0.971$ , and  $r = 0.987$ , respectively) in complex  
149 medium (Figure 2) and in defined medium ( $r = 0.955$ , and  $r = 0.973$ , respectively, Supplementary figure  
150 S1).

151 We next compared our model's performance with the benchmark models on the same test datasets. Our  
152 CRMnet model outperforms the benchmark transformer model proposed by (Vaishnav et al., 2022) in both  
153 native and random promoter test datasets in both mediums (Figure 3), and also outperforms other existing  
154 deep learning models referred to in (Vaishnav et al., 2022).

### 155 **3.2 Ablation study**

156 To determine the contribution to the performance of the various components of our model, we performed  
157 an ablation study. Specifically, for each ablation experiment, we constructed a new model with the ablated  
158 block removed from the original CRMnet architecture and trained the new model using the same training  
159 dataset as the original CRMnet. We then evaluated the performance of our models using the native and  
160 random test datasets (complex medium) (Figure 4).

161 Pre-training followed by fine-tuning on the particular dataset demonstrates substantial improvement  
162 compared with a model directly trained on the complex medium test set, due to the larger training data set  
163 size and improved starting point for fine-tuning model training by transfer learning. Overall performance  
164 decreased when the transformer and squeeze excitation blocks were removed, particularly for the random  
165 dataset, indicating that both blocks contribute to the model's predictive performance.

### 166 **3.3 Model interpretation**

167 To explore the biological insights from our trained model, we used saliency maps to interpret the model  
168 by visualizing predictive motifs. Saliency maps based on gradient backpropagation have been commonly  
169 applied to highlight model-derived features in input data (Adebayo et al., 2018), and have been used to  
170 interpret the relationship between the input and prediction of the trained model, where a segment of the  
171 input with a higher saliency value indicates an influential region for the model's prediction (Eraslan et al.,  
172 2019). By combining the gradient values with the input sequences, also known as input-masked gradients,  
173 we can visualize the segments that significantly impact the model's prediction (Eraslan et al., 2019).

174 For comparison, we first searched for significant TF motifs using probabilistic motif discovery based on  
175 expression levels (see Methods). We discovered the known yeast motifs associated with higher expression  
176 levels: NHP10 (High-mobility group (HMG) domain factors), REB1 (Myb/SANT domain factors), ABF1  
177 (Basic helix-loop-helix factors (bHLH), AZF1 (C2H2 zinc finger factors), and RAP1 (Myb/SANT domain  
178 factors) were the top 5 motifs.

179 We then visualized the input-masked gradients by plotting the saliency map logos generated from our  
180 fine-tuned model over yeast native sequences compared to these significant motifs from probabilistic motif  
181 discovery. The results show that the saliency map matches the known yeast motif logos (Figure 5 A-E and  
182 supplementary figure S2). To quantify this, we further calculated mean saliency map gradients over the  
183 positions in the sequences matched by these top 5 motifs and showed that these motifs are associated with  
184 substantially higher saliency gradients than the mean over all sequences as a control (Figure 5F).

185 Furthermore, we calculated the mean expression levels of yeast native sequences containing these top 5  
186 TF motifs compared to all sequences as a control. The result shows that these motifs are associated with  
187 higher expression levels as expected (Figure 5G). Notably, the saliency gradients showed that the TF motifs

188 associated with the highest expression levels contribute the most to the prediction of gene expression,  
189 supporting that our model extracts biologically meaningful features.

### 190 **3.4 Training time comparisons**

191 We next compared the training time between eight TPU V3 cores and eight GPU A100s under different  
192 batch sizes and precision settings (shown in Table 1). Training on the V100 GPU with batch size equal to  
193 1024 and default precision setting was used as the benchmark. The time-per-step is the average processing  
194 time to process one batch of data. The average epoch time represents how long it takes to run over all  
195 the data. The training time was estimated for the model to run 20 epochs without considering model  
196 convergence and the initialization time. The blank value indicates the batch size is too big and over the  
197 accelerating hardware's memory limit.

198 This study showed that: distributed training on multiple accelerator hardware can reduce training time  
199 significantly to feasible levels (from 70h to 4h); mixed precision can improve GPU performance, especially  
200 with large batch sizes, and can reduce the memory requirement; and the latest GPU A100 with 80 GB of  
201 graphics memory can take input with a larger batch size than TPU v3-8 where each TPU core has 32 GB of  
202 memory.

## 4 MATERIALS AND METHODS

### 203 **4.1 Data Collection**

204 In the study of Vaishnav et al. (2022), the yeast cells were grown under different mediums to exercise  
205 different metabolic pathways. Here we used data from cells grown in the complex (yeast extract, peptone  
206 and dextrose) and defined (lacking uracil) medium as specified in (Vaishnav et al., 2022). The training  
207 data was downloaded from <https://zenodo.org/record/4436477>, containing 30,722,376 and 20,616,659  
208 random sequences from complex and defined medium, respectively, with their expression values evaluated  
209 by Gigantic Parallel Reporter Assay experiment (Supplementary table S1).

210 For model testing data, we used independent test sets drawn from experimental replicate datasets,  
211 which were generated in Vaishnav et al. (2022), consisting of native and random promoter sequences  
212 (N=61,150 and N=2,954, respectively) from complex medium and (N=3,782 and N=5,284, respectively)  
213 from defined medium (Supplementary table S1). The test data was downloaded from GitHub repository (at  
214 <https://github.com/1edv/evolution> ).

### 215 **4.2 Model Training Setup**

216 We first trained individual models using data from complex medium and defined medium separately.  
217 Specifically, 30,722,376 random sequences from the complex medium and 20,616,659 random sequences  
218 from the defined medium were used to train the individual models. For the pre-trained model, we evenly  
219 sampled data from both mediums. In total, 51,339,035 sequences and their experimentally measured  
220 expression levels were used for pre-training the model. We then trained the pre-train model on complex  
221 and defined medium separately in the fine-tuning process.

222 The model's performance was assessed using independent test datasets as described above, and none of  
223 the sequences in the test datasets were used during model training. It is important to note that the test data  
224 library was measured in separate experiments from the training data and that the test data library contains  
225 fewer sequences than the experiments used to generate the training data. As a result, the expression value

226 associated with each sequence was precisely measured in the test data (by averaging 100 yeast cells per  
227 sequence).

### 228 4.3 Data Pre-processing

229 We first used TensorFlow 2 *tf.keras.preprocessing.pad\_sequence* function to pad the original sequence  
230 to a length equal to 112 nt, as the original input sequences do not have a fixed length. We truncated the  
231 sequences from the end for sequences longer than 112 nt; for sequences shorter than 112 nt, we padded the  
232 sequences from the end with “N”. We then used one-hot encoding to encode the nucleotides based on the  
233 order of “A”, “C”, “G”, and “T”. Specifically, we used *tf.keras.layers.StringLookup* function to encode the  
234 input sequences and define the vocabulary as [‘A’, ‘C’, ‘G’, ‘T’] while characters not in the vocabulary (i.e.,  
235 “N”) are encoded in the fifth dimension. Therefore, “A”, “C”, “G”, “T” and “N” are encoded to [1,0,0,0,0],  
236 [0,1,0,0,0], [0,0,1,0,0], [0,0,0,1,0] and [0,0,0,0,1], respectively.

### 237 4.4 Model Execution

238 Since we mainly used TPU v3-8 VM to train our model, which contains eight tensor processing cores,  
239 we set the global batch size to 8192, where each TPU core is assigned 1024 samples. To accelerate  
240 the efficiency of feeding data into the model, we prefetch the training data into the memory using the  
241 *tf.data.Dataset.prefetch()* function. This operation reduced the latency and improved the data pipeline  
242 throughput. And we set the buffer size for prefetching the data equal to *tf.data.AUTOTUNE*, which will  
243 optimize the number of data prefetched automatically.

244 We distributed the training process of our model in two different hardware: TPUs and GPUs. For Tensor  
245 Processing Units (TPU) provided by Google TPU Research Cloud, we trained the model with the TPU  
246 v3-8 virtual machine. The TPU v3-8 virtual machine comes with 8 processing cores. So, we set the global  
247 batch size equals to 8,192, in which each core is allocated a local minibatch size equal to 1,024. For the  
248 GPUs, we trained the model with the Nvidia DGX A100 provided by Australian National Computational  
249 Infrastructure, which comes with eight A100 GPUs. Thus, following the same setup with TPUs, we set the  
250 global batch size equal to 8,192 to ensure each A100 GPU processes a minibatch with 1,024 samples in  
251 parallel.

252 We used Huber loss to calculate the difference between predictions and true values for the loss function  
253 since it is less sensitive to outliers than the mean-square error in regression problems (Huber, 1992). We  
254 use Adam optimizer to optimize the Huber loss function. For the learning rate scheduler, we set a learning  
255 rate warm-up in the first 10 epochs, which gradually increase the learning rate of the optimizer from 0.0001  
256 x NUM of HARDWARE (i.e., 0.0008) to 0.001 x NUM of HARDWARE (i.e., 0.008). A cosine decay  
257 learning rate scheduler was then used to gradually reduce the learning rate 0.0001 x NUM of HARDWARE  
258 (i.e., 0.0008). To avoid overfitting, an early stop call-back function was used. This call-back function  
259 monitors the model’s performance over the validation dataset. If the model’s validation R-square value is  
260 not improved in the most recent ten epochs, it stops training and restores the model weight with the best  
261 performance over validation data.

262 We use the Tensorflow 2 *tf.distribute\_for\_distributed\_training.MirroredStrategy* to train the model on a  
263 DGX A100 box which contains eight A100 GPUs. We used the *tf.distribute.TPUStrategy* for training on  
264 TPU v3-8 virtual machine, which has eight tensor cores. Both strategies are synchronous training processes  
265 intended to distribute training across multiple processing units on a single machine. The synchronous  
266 strategy first copied all of the model’s variables to each processor. The gradients from each processor  
267 were then fused using all-reduce. The resulting value will be synchronized to all instances stored in each

268 processor. Since our model training does not require high precision and training on TPUs automatically  
269 uses float16, so for training on GPUs, we use the mix precision policy by setting up precision equal to  
270 mixed\_float16. The mixed precision policy improves our model training speed on Amber GPUs without  
271 losing accuracy.

272 We further compared the training speed between A100 GPUs and TPU V3-8 with different local batch  
273 sizes and mixed precision policy. To reduce the impact of other factors, such as the time used to build the  
274 computational graph, we exclude the time reported in the first epoch and take the maximum value from  
275 the time-per-step column. The time-per-step report is the average time the hardware processes each batch  
276 in one epoch. The training speed comparison is shown in Figure 1. Note that the final training time is an  
277 optimistic estimation for training the model for 20 epochs, which doesn't guarantee the model coverage  
278 and doesn't consider the overhead time used for inter-core communication.

279 For the software and packages, we used Python 3.8.10 to write the code for training and evaluation. For  
280 data pre-processing, we mainly use NumPy 1.22.1 and Pandas 1.5.0 packages. For building a deep learning  
281 model, we use TensorFlow 2.8.0 framework to implement and train the neural network. Functions from  
282 TensorFlow Addons 0.16.1 and SciPy 1.9.3 are used to evaluate models' performance. Matplotlib 3.6.1 and  
283 Seaborn 0.12.1 are used for visualization.

#### 284 **4.5 Motif Discovery**

285 We used the motif discovery tool MEME suite (Bailey et al., 2015) "Differential Enrichment mode" to  
286 detect the motif enrichment in the top 2000 sequences with high gene expression against the bottom 2000  
287 sequences with low gene expression. We used FIMO in the MEME suite to search for motif hits in yeast  
288 native promoter sequences.

289 We further used two ranking-based methods, Discovering Ranked Imbalanced Motifs using Suffix Trees  
290 (DRIMust) (Leibovich et al., 2013) and rGADEMm (Mercier et al., 2011), to determine *de novo*  
291 motifs in a ranked list of sequences, which were ranked from high to low expression values. DRIMust  
292 uses suffix trees to identify overrepresented motifs in the top-ranked sequences and further evaluates  
293 the obtained k-mers by minimum-hypergeometric (mHG) approach (Leibovich et al., 2013). rGADEM  
294 combines spaced dyads and an expectation-maximization (EM) algorithm. The spaced dyads are identified  
295 by their overrepresentation in the input sequences, and a genetic algorithm is further employed to mark  
296 them significant and to declare them as motifs (Mercier et al., 2011). We used Bioconductor packages  
297 "TFBStools" (Tan and Lenhard, 2016), "JASPAR" (Castro-Mondragon et al., 2022), to match the identified  
298 motifs with known JASPAR Yeast motifs.

299 We selected the top 5 motifs ranked by E-value in MEME that were reproduced by the rank-based  
300 methods.

## 301 **5 CONCLUSION**

302 In this study, we introduced CRMnet, a novel neural network architecture that accurately predicts the  
303 gene expression levels of yeast promoter sequences. First, we adopted the U-Net architecture from the  
304 image semantic segmentation task and applied it to genomic sequences as a feature extractor. Furthermore,  
305 we utilized transformer encoders, which leverage self-attention mechanisms to extract additional useful  
306 information from genomic sequences. The extracted features were then fed into an MLP to predict the  
307 expression levels as a regression problem. By testing on data not used during the training process, our model  
surpassed the benchmark networks of Vaishnav et al. (2022). Our ablation studies of the CRMnet model



308 demonstrated the potential for improvements in predictive performance for a given biological problem by  
309 the design of custom DNN architectures. In particular, augmentation of a model with a combination of  
310 CNN and additional transformer stages guided by training and testing results on large high-throughput  
311 datasets can give useful increments in performance.

312 Importantly, high performance DNN models extracting dependency information via attention mechanisms  
313 allow for biological insights through model interpretation. In this study, we visualized regions of key  
314 importance for expression regulation by plotting the saliency map over the input yeast DNA sequences.  
315 Notably, we found that the logo plots constructed from saliency maps over the input sequences are  
316 correlated with the sequence motifs of known yeast transcription factors. Future improvements in DNN  
317 model architectures along with improved model interpretation methods will be key enablers for future  
318 biological discoveries of subtle regulatory signals.

## 6 FIGURE LEGEND

319 **Figure 1: CRMnet model's architecture.** Our CRMnet consists of Squeeze and Excitation (SE) Encoder  
320 Blocks, Transformer Encoder Blocks, SE Decoder Blocks, SE Block and Multi-Layer Perceptron (MLP).  
321 Similar to the UNet architecture, the encoder and corresponding decoder at the same level have a  
322 skip connection (SC) so the decoder utilizes the concatenation of the upsampled feature map with the  
323 corresponding higher resolution encoder feature map at that level.

324 **Figure 2: Prediction of expression from yeast native sequences from CRMnet.** CRMnet tested on **A:**  
325 native promoter sequences; and **B:** random promoter sequences. The y-axes represent measured expression  
326 levels, while the x-axes represent predicted expression levels. As a benchmark, the model performance  
327 metrics of the Pearson  $r$  value, associated two-tailed p-values, and R-square for the transformer model  
328 from (Vaishnav et al., 2022) showed: A:  $r=0.963$ ,  $P < 5 \times 10^{-324}$ ,  $R^2=0.927$ ; B:  $r=0.978$ ,  $P < 5 \times 10^{-324}$ ,  
329  $R^2=0.95$ .

330 **Figure 3: Benchmarking the CRMnet's performance against existing neural network architectures.**  
331 The prediction performance of CRMnet on yeast native promoters and random promoters was compared  
332 with the transformer and CNN models from (Vaishnav et al., 2022) and other existing DNNs (DeepAtt (Li  
333 et al., 2021), DanQ (Quang and Xie, 2016) and DeepSEA (Zhou and Troyanskaya, 2015)). The performance  
334 of DeepAtt, DanQ and DeepSEA on random promoters not published in (Vaishnav et al., 2022)

335 **Figure 4: Prediction performance for ablation study.** Comparisons of prediction performance of models  
336 testing on native promoters and random promoters are shown: the full model (fine-tuned CRMnet), the  
337 model without transfer learning (CRMnet without pre-training), the model without transformer block  
338 (CRMnet without transformer), and the model without squeeze excitation (SE) block (CRMnet without SE  
339 block).

340 **Figure 5: Model interpretation by saliency maps. A-E:** The top 5 yeast TF motifs detected by motif  
341 discovery: NHP10, REB1, ABF1, AZF1, and RBP1. Shown is an example sequence with its saliency map  
342 gradients over 80-nt for each motif, aligned with the known TF motif logo and E-values. **F:** Mean saliency  
343 map gradients over these top 5 motif matches in yeast native sequences, and mean saliency map gradients  
344 over all sequences as the controls. **G:** Mean expression levels of yeast native sequences containing these  
345 top 5 TF motifs, and all native sequences as the control.

## 7 DATA AVAILABILITY STATEMENT

346 The code is available on GitHub at <https://github.com/jiayuwen/CRMnet>. The final model and preprocessed  
347 data are available at <https://zenodo.org/record/7375243#.Y4gDjS0RoUE>.

## 8 ACKNOWLEDGMENTS

348 This study was supported by the National Computational Infrastructure (NCI Australia) and Google's TPU  
349 Research Cloud (TRC). We thank Dr. Jingbo Wang from NCI for the support.

## 9 CONFLICT OF INTEREST STATEMENT

350 The authors declare that the research was conducted in the absence of any commercial or financial  
351 relationships that could be construed as a potential conflict of interest.

## 10 AUTHOR CONTRIBUTIONS

352 KD conducted all machine learning coding and drafted the manuscript. GD collected the data and performed  
353 the motif analysis. BJP and JW supervised the project, provided guidance, discussed results and revised the  
354 manuscript. All authors read the current manuscript and approved the submitted version.

## 11 FUNDING

355 BJP was supported by Australian National University Jubilee Joint Fellowship. Work in JW lab was  
356 supported by the Australian Research Council (ARC) Future Fellowship (FT160100143) and Australian  
357 National University Future Scheme.

## 12 SUPPLEMENTAL DATA

358 The Supplementary Material for this article can be found at: "supplementary\_CRMnet.pdf"

## REFERENCES

- 359 Adebayo, J., Gilmer, J., Muelly, M., Goodfellow, I., Hardt, M., and Kim, B. (2018). Sanity checks for  
360 saliency maps. *Advances in neural information processing systems* 31
- 361 Bailey, T. L., Johnson, J., Grant, C. E., and Noble, W. S. (2015). The meme suite. *Nucleic acids research*  
362 43, W39–W49
- 363 Castro-Mondragon, J. A., Riudavets-Puig, R., Rauluseviciute, I., Berhanu Lemma, R., Turchi, L., Blanc-  
364 Mathieu, R., et al. (2022). Jaspas 2022: the 9th release of the open-access database of transcription factor  
365 binding profiles. *Nucleic acids research* 50, D165–D173
- 366 Chen, J., Lu, Y., Yu, Q., Luo, X., Adeli, E., Wang, Y., et al. (2021). Transunet: Transformers make strong  
367 encoders for medical image segmentation. *arXiv preprint arXiv:2102.04306*
- 368 Davidson, E. H. and Erwin, D. H. (2006). Gene regulatory networks and the evolution of animal body  
369 plans. *Science* 311, 796–800
- 370 de Boer, C. G., Vaishnav, E. D., Sadeh, R., Abeyta, E. L., Friedman, N., and Regev, A. (2020). Deciphering  
371 eukaryotic gene-regulatory logic with 100 million random promoters. *Nature biotechnology* 38, 56–65

- 372 Dosovitskiy, A., Beyer, L., Kolesnikov, A., Weissenborn, D., Zhai, X., Unterthiner, T., et al. (2020).  
373 An image is worth 16x16 words: Transformers for image recognition at scale. *arXiv preprint*  
374 *arXiv:2010.11929*
- 375 Eraslan, G., Avsec, Ž., Gagneur, J., and Theis, F. J. (2019). Deep learning: new computational modelling  
376 techniques for genomics. *Nature Reviews Genetics* 20, 389–403
- 377 Hu, J., Shen, L., and Sun, G. (2018). Squeeze-and-excitation networks. In *Proceedings of the IEEE*  
378 *conference on computer vision and pattern recognition*. 7132–7141
- 379 Huber, P. J. (1992). Robust estimation of a location parameter. In *Breakthroughs in statistics* (Springer).  
380 492–518
- 381 Leibovich, L., Paz, I., Yakhini, Z., and Mandel-Gutfreund, Y. (2013). Drimust: a web server for discovering  
382 rank imbalanced motifs using suffix trees. *Nucleic acids research* 41, W174–W179
- 383 Li, J., Pu, Y., Tang, J., Zou, Q., and Guo, F. (2021). Deepatt: a hybrid category attention neural network for  
384 identifying functional effects of dna sequences. *Briefings in bioinformatics* 22
- 385 Mathelier, A., Shi, W., and Wasserman, W. W. (2015). Identification of altered cis-regulatory elements in  
386 human disease. *Trends in Genetics* 31, 67–76
- 387 Mercier, E., Droit, A., Li, L., Robertson, G., Zhang, X., and Gottardo, R. (2011). An integrated pipeline  
388 for the genome-wide analysis of transcription factor binding sites from chip-seq. *PloS one* 6
- 389 Ni, P. and Su, Z. (2021). Accurate prediction of cis-regulatory modules reveals a prevalent regulatory  
390 genome of humans. *NAR genomics and bioinformatics* 3
- 391 Quang, D. and Xie, X. (2016). Danq: a hybrid convolutional and recurrent deep neural network for  
392 quantifying the function of dna sequences. *Nucleic acids research* 44, e107–e107
- 393 Ronneberger, O., Fischer, P., and Brox, T. (2015). U-net: Convolutional networks for biomedical  
394 image segmentation. In *International Conference on Medical image computing and computer-assisted*  
395 *intervention* (Springer), 234–241
- 396 Springenberg, J. T., Dosovitskiy, A., Brox, T., and Riedmiller, M. (2014). Striving for simplicity: The all  
397 convolutional net. *arXiv preprint arXiv:1412.6806*
- 398 Stewart, A. J., Hannenhalli, S., and Plotkin, J. B. (2012). Why transcription factor binding sites are ten  
399 nucleotides long. *Genetics* 192, 973–985
- 400 Tan, G. and Lenhard, B. (2016). Tfbstools: an r/bioconductor package for transcription factor binding site  
401 analysis. *Bioinformatics* 32, 1555–1556
- 402 Vaishnav, E. D., de Boer, C. G., Molinet, J., Yassour, M., Fan, L., Adiconis, X., et al. (2022). The evolution,  
403 evolvability and engineering of gene regulatory dna. *Nature* 603, 455–463
- 404 Vaswani, A., Shazeer, N., Parmar, N., Uszkoreit, J., Jones, L., Gomez, A. N., et al. (2017). Attention is all  
405 you need. *Advances in neural information processing systems* 30
- 406 Wang, Y., Wei, G.-Y., and Brooks, D. (2020). A systematic methodology for analysis of deep learning  
407 hardware and software platforms. *Proceedings of Machine Learning and Systems* 2, 30–43
- 408 You, K., Liu, Y., Wang, J., and Long, M. (2021). Logme: Practical assessment of pre-trained models for  
409 transfer learning. In *International Conference on Machine Learning* (PMLR), 12133–12143
- 410 Zhou, J. and Troyanskaya, O. G. (2015). Predicting effects of noncoding variants with deep learning-based  
411 sequence model. *Nature methods* 12, 931–934

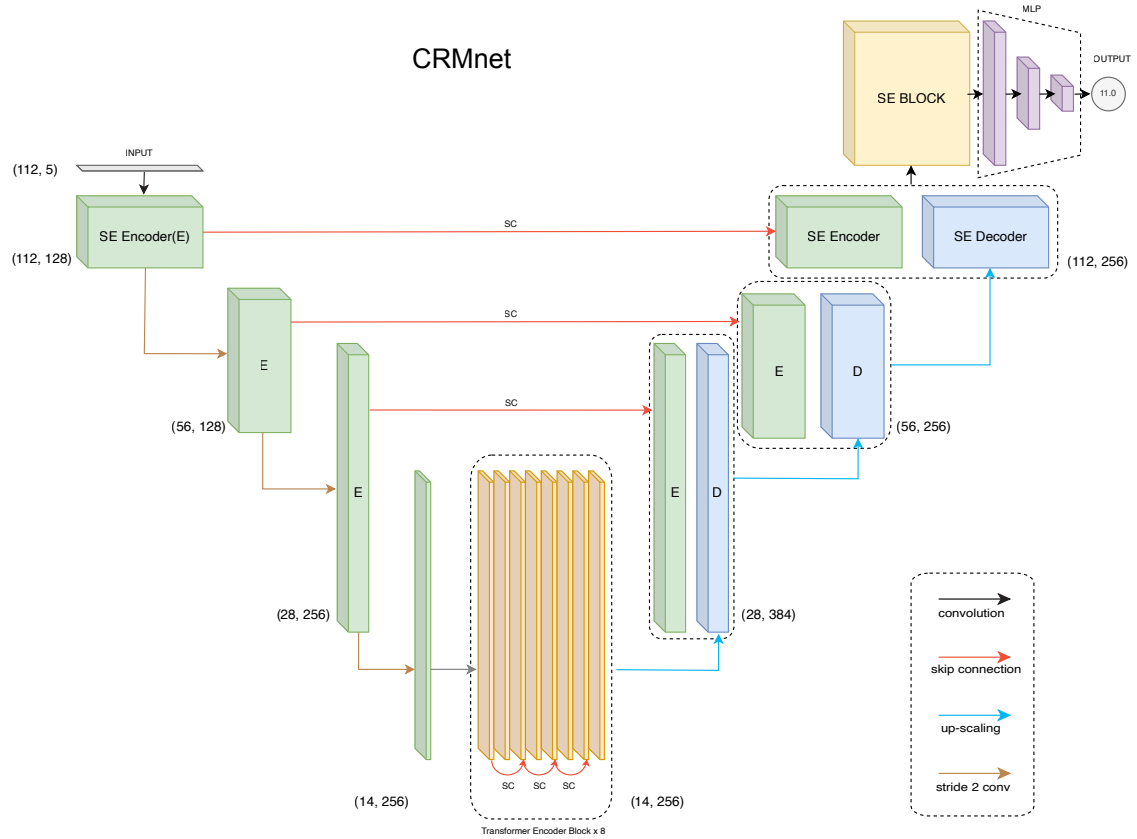

**Figure 1. CRMnet model's architecture.** Our CRMnet consists of Squeeze and Excitation (SE) Encoder Blocks, Transformer Encoder Blocks, SE Decoder Blocks, SE Block and Multi-Layer Perceptron (MLP). Similar to the UNet architecture, the encoder and corresponding decoder at the same level have a skip connection (SC) so the decoder utilizes the concatenation of the upsampled feature map with the corresponding higher resolution encoder feature map at that level.

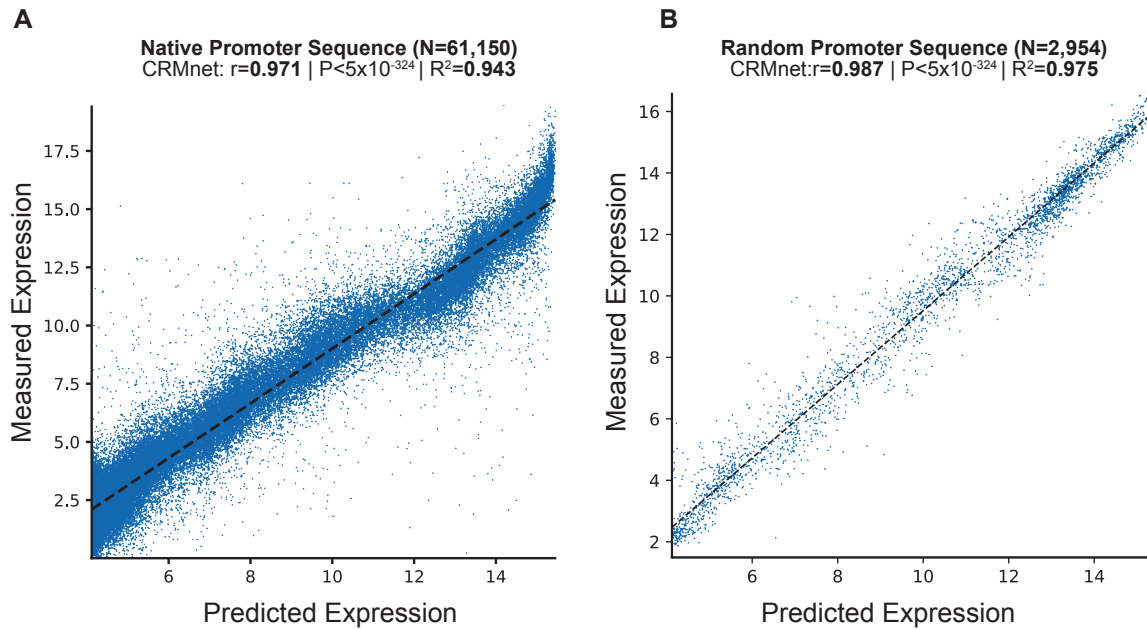

**Figure 2. Prediction of expression from yeast native sequences from CRMnet.** CRMnet tested on **A**: native promoter sequences; and **B**: random promoter sequences. The y-axes represent measured expression levels, while the x-axes represent predicted expression levels. As a benchmark, the model performance metrics of the Pearson  $r$  value, associated two-tailed p-values, and R-square for the transformer model from (Vaishnav et al., 2022) showed: A:  $r=0.963$ ,  $P < 5 \times 10^{-324}$ ,  $R^2=0.927$ ; B:  $r=0.978$ ,  $P < 5 \times 10^{-324}$ ,  $R^2=0.95$ .

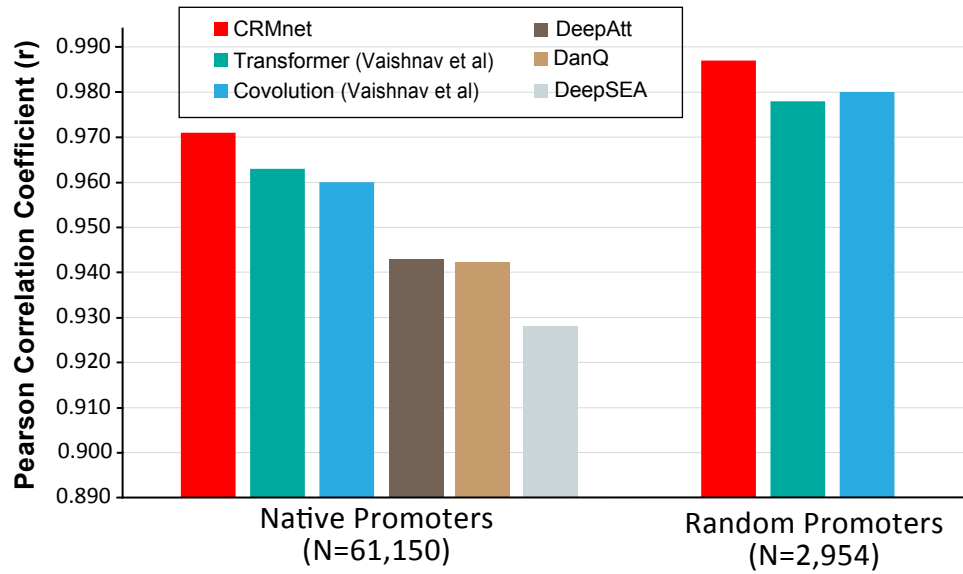

**Figure 3. Benchmarking the CRMnet’s performance against existing neural network architectures.** The prediction performance of CRMnet on yeast native promoters and random promoters was compared with the transformer and CNN models from (Vaishnav et al., 2022) and other existing DNNs (DeepAtt (Li et al., 2021), DanQ (Quang and Xie, 2016) and DeepSEA (Zhou and Troyanskaya, 2015)). The performance of DeepAtt, DanQ and DeepSEA on random promoters not published in (Vaishnav et al., 2022)

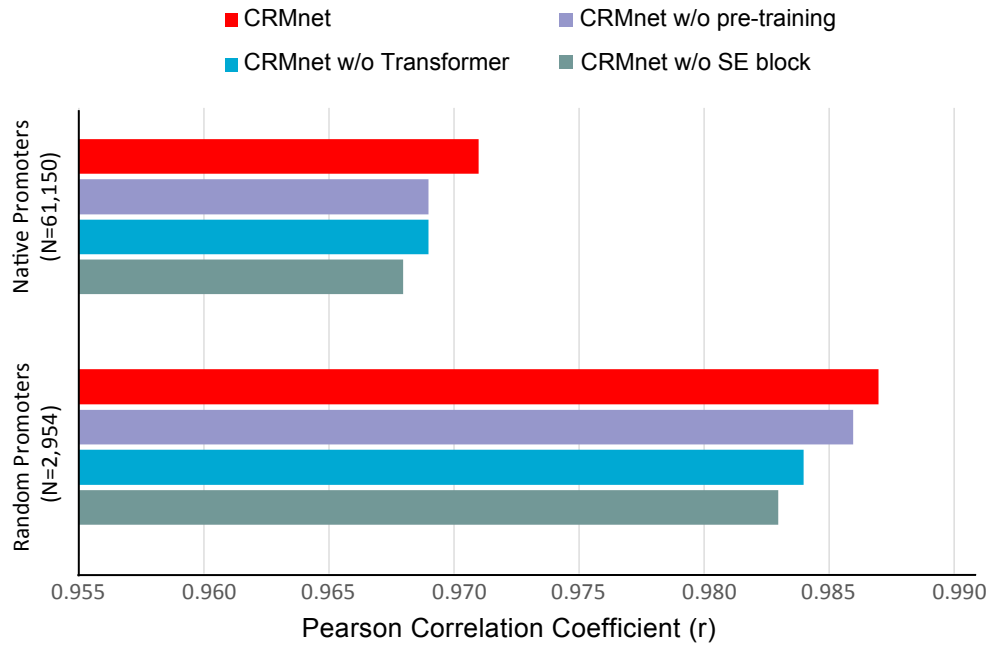

**Figure 4. Prediction performance for ablation study.** Comparisons of prediction performance of models testing on native promoters and random promoters are shown: the full model (fine-tuned CRMnet), the model without transfer learning (CRMnet without pre-training), the model without transformer block (CRMnet without transformer), and the model without squeeze excitation (SE) block (CRMnet without SE block).

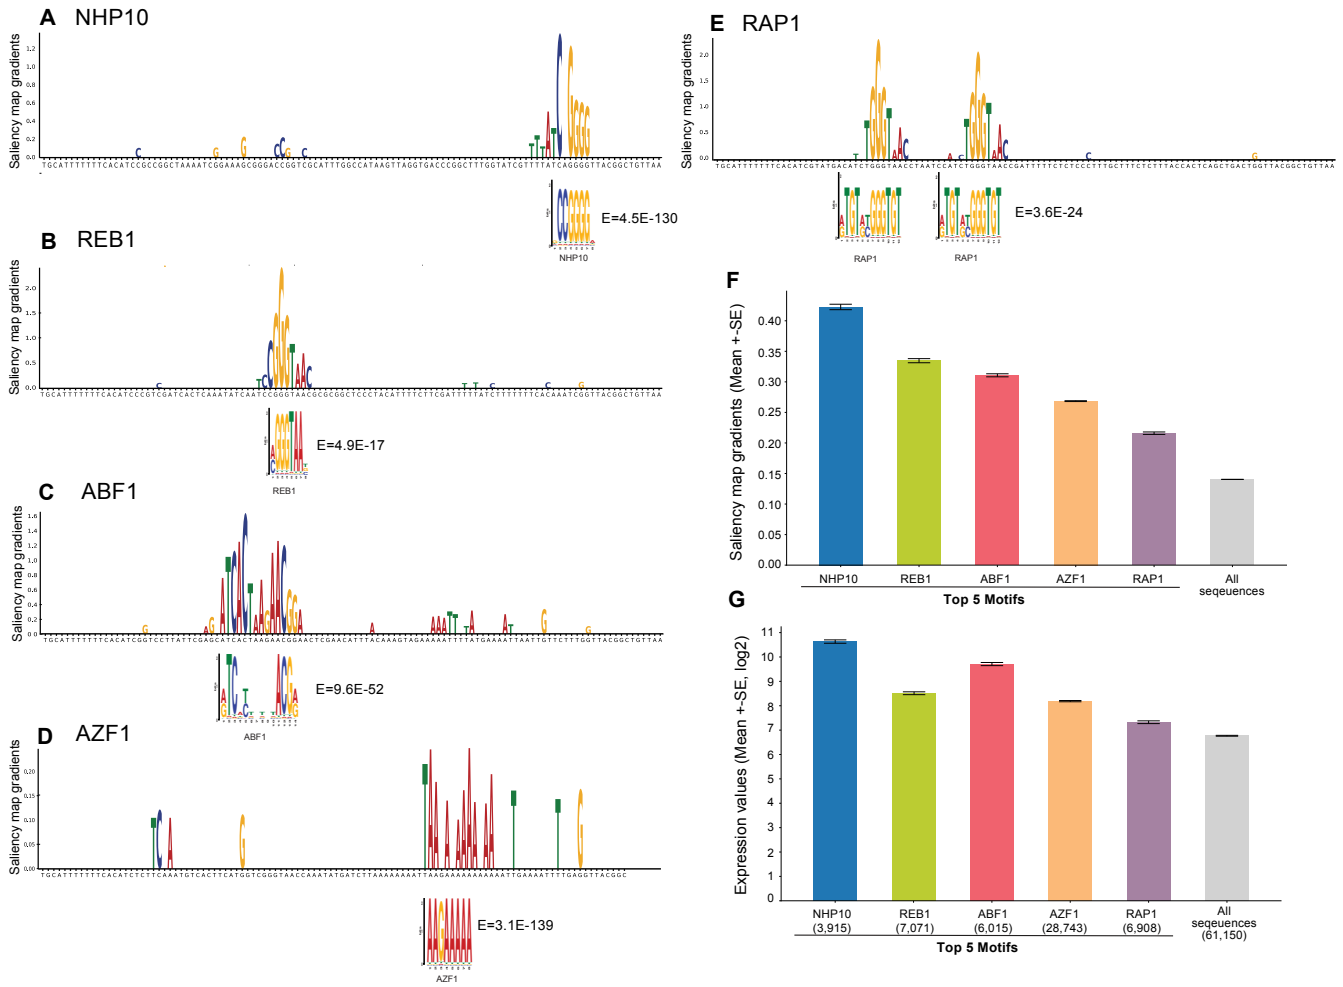

**Figure 5. Model interpretation by saliency maps. A-E:** The top 5 yeast TF motifs detected by motif discovery: NHP10, REB1, ABF1, AZF1, and RBP1. Shown is an example sequence with its saliency map gradients over 80-nt for each motif, aligned with the known TF motif logo and E-values. **F:** Mean saliency map gradients over these top 5 motif matches in yeast native sequences, and mean saliency map gradients over all sequences as the controls. **G:** Mean expression levels of yeast native sequences containing these top 5 TF motifs, and all native sequences as the control.



| local batch size | Hardware | Number of processor | Mixed Precision | time per step(s) | average epoch(min) | Training time(hour) |
|------------------|----------|---------------------|-----------------|------------------|--------------------|---------------------|
| 1024             | V100 32G | 1                   | float32         | 0.434            | 210.37             | 70.12               |
|                  | A100 80G | 8                   | float32         | 0.187            | 11.81              | 3.94                |
|                  | A100 80G | 8                   | mixed float16   | 0.187            | 11.81              | 3.94                |
|                  | TPU-V3   | 8                   | float32         | 0.172            | 10.86              | 3.62                |
| 1024             | TPU-V3   | 8                   | mixed bfloat16  | 0.165            | 10.42              | 3.47                |
|                  | A100 80G | 8                   | float32         | 0.675            | 10.65              | 3.55                |
|                  | A100 80G | 8                   | mixed float16   | 0.477            | 7.51               | 2.51                |
|                  | TPU-V3   | 8                   | float32         | 0.726            | 11.46              | 3.82                |
| 4096             | TPU-V3   | 8                   | mixed bfloat16  | 0.611            | 9.64               | 3.21                |
|                  | A100 80G | 8                   | float32         | 1.337            | 10.54              | 3.51                |
|                  | A100 80G | 8                   | mixed float16   | 0.889            | 7.01               | 2.34                |
|                  | TPU-V3   | 8                   | float32         | -                | -                  | -                   |
| 8192             | TPU-V3   | 8                   | mixed bfloat16  | 1.353            | 10.67              | 3.56                |
|                  | A100 80G | 8                   | float32         | -                | -                  | -                   |
|                  | A100 80G | 8                   | mixed float16   | 1.718            | 6.76               | 2.25                |
|                  | TPU-V3   | 8                   | float32         | -                | -                  | -                   |
| 16384            | TPU-V3   | 8                   | mixed bfloat16  | -                | -                  | -                   |

**Table 1. Summary of training speed for different batch sizes and accelerator hardware configurations.** The benchmark training time was calculated by training the model on complex medium data with a single V100 GPU, with a local batch size of 1,024 and no mixed precision policy. The final training time is based on training the model for 20 epochs without considering the model’s convergence. The training time was left empty if the local batch was too large and exceeded the hardware’s graphic memory limit. For distributed training on multiple hardware, we compared the training time between TPU v3-8 and DGX box with eight A100s, where each configuration contains eight accelerator hardware.
